# Supplementary material
Source: MDPI journal article supplement (https://www.mdpi.com/2075-163X/11/4/432)
Supplement: s1 [file s1 › minerals-1175773-SI.pdf]

## Article

# Carbon-Assisted Bioleaching of Chalcopyrite and Three Chalcopyrite/Enargite-Bearing Complex Concentrates

Keishi Oyama <sup>1,†</sup>, Kyohei Takamatsu <sup>1,†</sup>, Kaito Hayashi <sup>1</sup>, Yuji Aoki <sup>2</sup>, Shigeto Kuroiwa <sup>2</sup>, Tsuyoshi Hirajima <sup>2</sup> and Naoko Okibe <sup>1,\*</sup>

<sup>1</sup> Department of Earth Resources Engineering, Kyushu University, Fukuoka 819-0395, Japan; o.keishi829@gmail.com (K.O.); krrkyou35@gmail.com (K.T.); k-hayashi19@mine.kyushu-u.ac.jp (K.H.)

<sup>2</sup> Sumitomo Metal Mining, Co. Ltd., Ehime 792-0002, Japan; yuji.aoki.m3@smm-g.com (Y.A.); shigeto.kuroiwa.s5@smm-g.com (S.K.); tsuyoshi.hirajima.n7@smm-g.com (T.H.)

\* Correspondence: okibe@mine.kyushu-u.ac.jp

† These authors contributed equally to this work.

## Supplementary Materials

**Citation:** Oyama, K.; Takamatsu, K.; Hayashi, K.; Aoki, Y.; Kuroiwa, S.; Hirajima, T.; Okibe, N. Carbon-Assisted Bioleaching of Chalcopyrite and Three Chalcopyrite/Enargite-Bearing Complex Concentrates. *Minerals* **2021**, *11*, 432. <https://doi.org/10.3390/min11040432>

Academic Editor: Francisco C. Mora

Received: 24 March 2021

Accepted: 16 April 2021

Published: 19 April 2021

**Publisher's Note:** MDPI stays neutral with regard to jurisdictional claims in published maps and institutional affiliations.

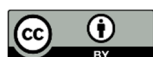

**Copyright:** © 2021 by the authors. Licensee MDPI, Basel, Switzerland. This article is an open access article distributed under the terms and conditions of the Creative Commons Attribution (CC BY) license (<http://creativecommons.org/licenses/by/4.0/>).

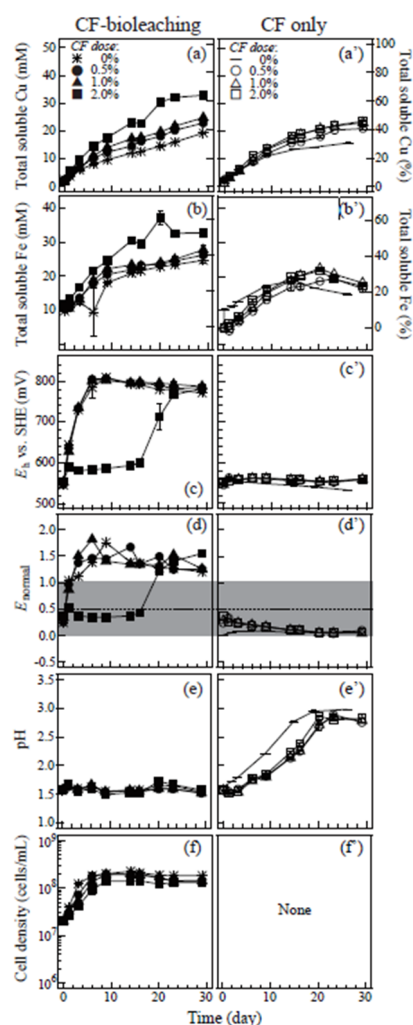

**Figure S1.** Carbon Fiber (CF)-assisted chalcopyrite leaching with (a-f) or without (a'-f') bioleaching microorganisms. Changes in the total soluble Cu concentration (a, a'), total soluble Fe concentration (b, b'), Eh (c, c'), Enormal (d, d'), pH (e, e') and planktonic cell density (f, f') at different CF doses are shown: 0% (\*, -), 0.5% (●, ○), 1.0% (▲, △), 2.0% (■, ▭). Grey shadow in (d) and (d') indicated the "active region" for chalcopyrite dissolution [10, 11]. Error bars depicting averages are not visible in some cases as they are smaller than the data point symbols.

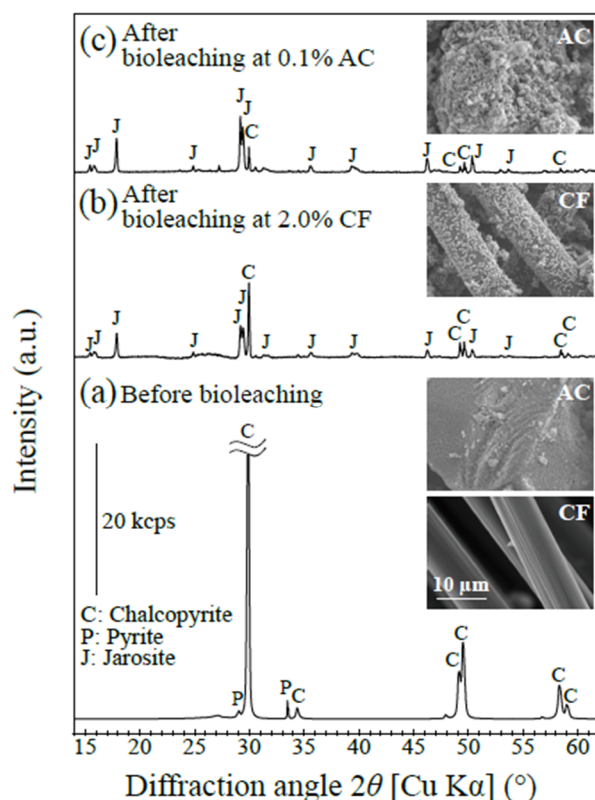

**Figure S2.** X-ray diffraction patterns of chalcopyrite before bioleaching (a) and after bioleaching with 2.0% CF (b) or with 0.1% AC (c). C: chalcopyrite ( $\text{CuFeS}_2$ ; PDF No. 01-075-6866), P: pyrite ( $\text{FeS}_2$ ; PDF No. 00-042-1340), J: jarosite ( $\text{K}(\text{Fe}_3(\text{SO}_4)_2(\text{OH})_6$ ); PDF No. 01-076-0629). SEM images of the surface of AC and CF are also presented.

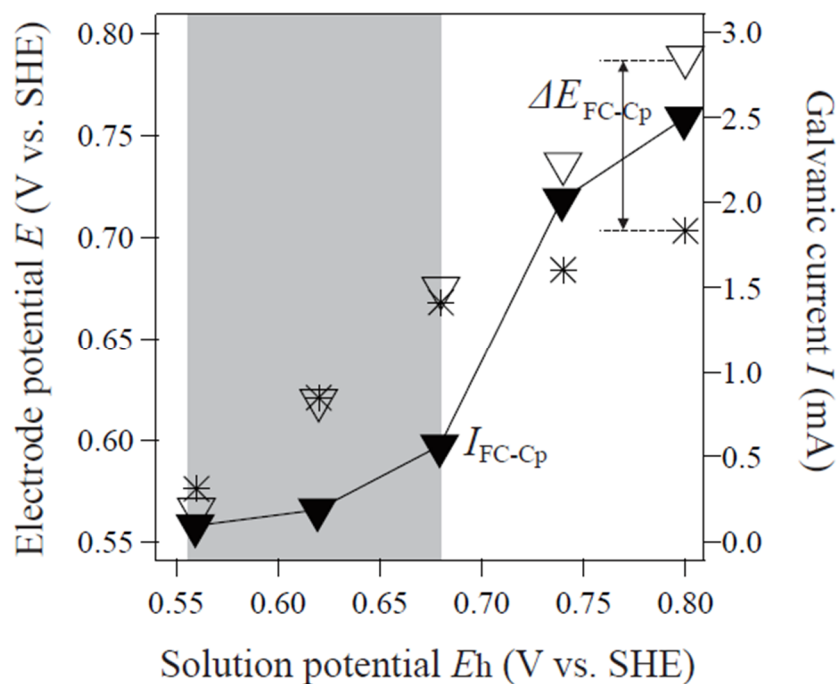

**Figure S3.** The mineral electrode potential of chalcopyrite (Cp) (\*) and carbon fiber (CF) ( $\nabla$ ) as the function of  $E_h$ :  $\Delta$  indicates the amount of galvanic electromotive force created between chalcopyrite and CF. The galvanic current created between chalcopyrite and CF ( $\blacktriangledown$ ) is also shown as the function of  $E_h$ . The grey zone depicts the  $E_h$  range wherein galvanic interaction between chalcopyrite and CF is considered minor.

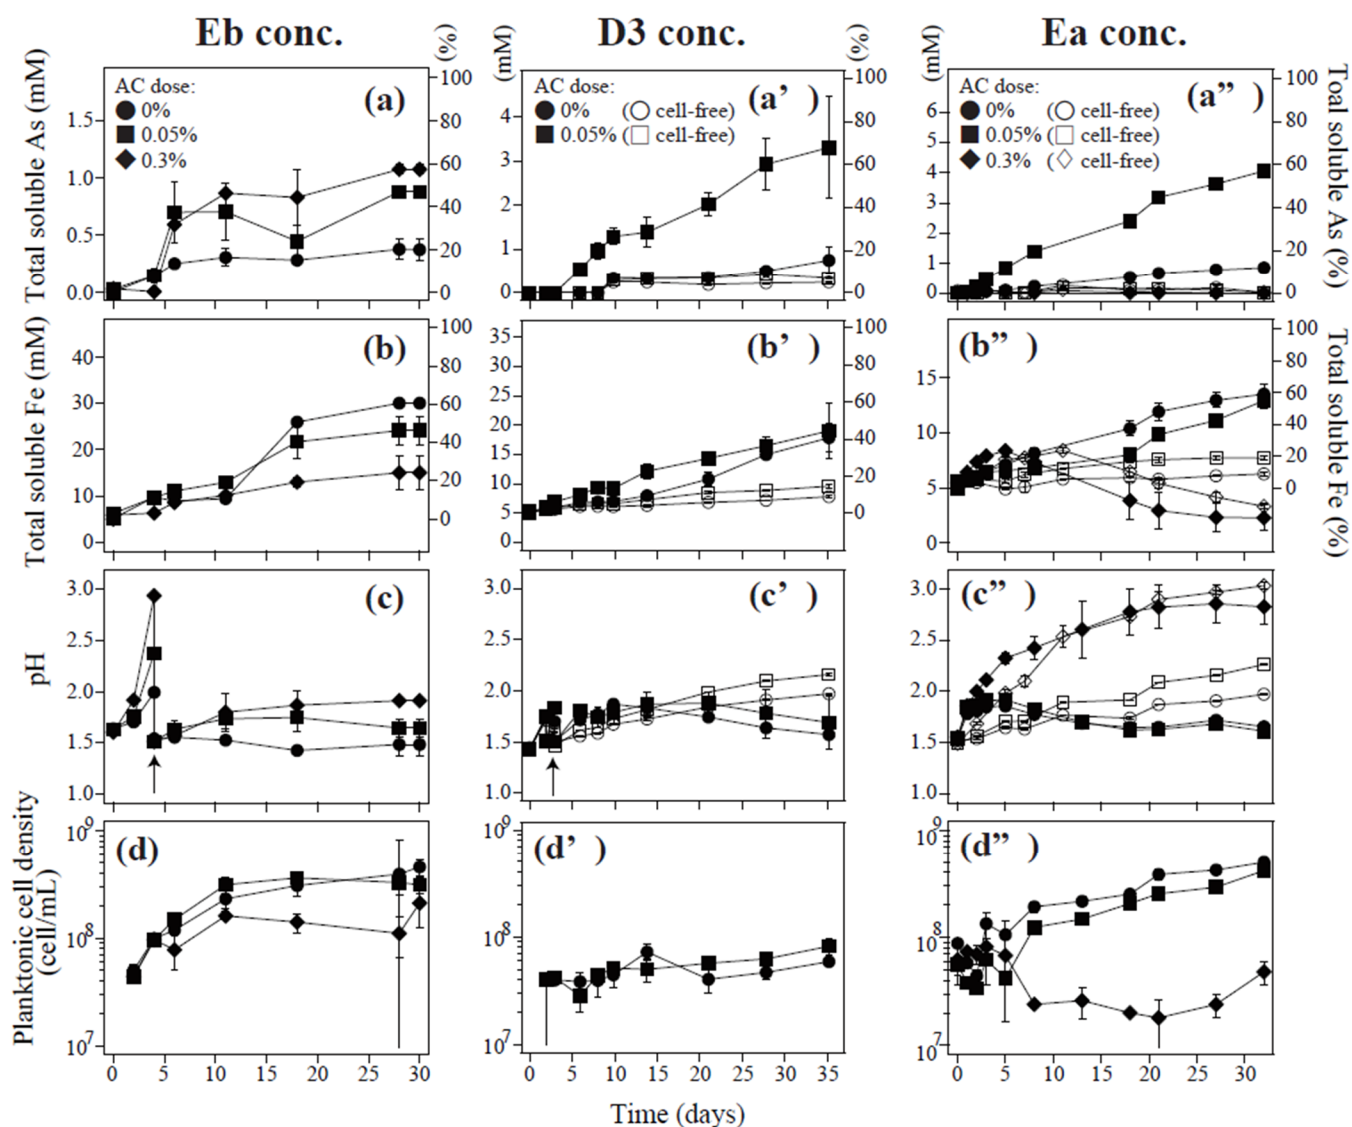

**Figure S4.** Activated Carbon (AC)-assisted bioleaching of chalcopyrite/enargite-bearing concentrates, Eb (a-d), D3 (a'-d') and Ea (a''-d''). Changes in the total soluble As concentration (a, a', a''), total soluble Fe concentration (b, b', b''), pH (c, c', c'') and planktonic cell density (d, d', d'') at different AC doses are shown: 0% (●, ○), 0.05% (■, □), 0.3% (◆, ◇). Error bars depicting averages are not visible in some cases as they are smaller than the data point symbols.
